# Supplementary material for: Breast cancer prognosis and P-cadherin expression: systematic review and study-level meta-analysis
Source: HighWire-hosted journal article supplement (doi:10.1136/bmjspcare-2020-002204), 2020-09-17
Supplement: bmjspcare-2020-002204supp002_data_supplement.xls [file bmjspcare-2020-002204supp002_data_supplement.xls]

## Sheet: Sheet1
	Characteristics of the included studies
No.	Study	Year	Region	Sample size (n)	No.of P-cadherin high expression(%)	Tumor type	Cut-off	Preoperative treatment	Clinicopathological information	Outcome measures	Follow-up（years）	Survival analysis	Score（%）
1	Adamczyk A[5]	2016	Poland	136	66 (48.5)	breast cancer	>10%	no	Lymph node status	-	-	-	77.2727
2	Arnes JB[35]	2005	Ashkenazi Jewish	309	80 (25.9)	Basal Epithelial Phenotype	>10%	no	Histologic grade, Lymph node status, ER, HER2, Tumorsize (2cm)	OS	10	Multivariate	86.3636
3	Arnes JB[41]	2008	Norway	180	59 (32.8)	invasive breast cancer	>10%	no	-	OS	10	Multivariate	88.6364
4	Ben Hamida A[43]	2008	Franch	729	380 (52.1)	T4d tumors	>10%	yes (neo-adjuvant chemotherapy)	luminal subtype	-	-	-	61.3636
5	Carvalho ST[27]	2011	Brazil	82	32 (39.0)	stage IIA	>10%	no	-	OS	10	Univariate	70.4545
6	Cui J[18]	2013	China	80	34 (42.5)	invasive breast carcinoma	unknown	no	ER,Lymph node status	-	-	-	70.4545
7	Fanelli MA[37]	2008	Argentina	215	114(53.0)	breast cancer	>1%	no	ER,Her-2,Lymph node status	OS, DFS	10	Multivariate	54.5455
8	Faria G[32]	2012	Portugal	86	34 (39.5)	breast cancer	>10%	no	Molecular sub-type, TNM stage, Histological grade ,T3/4, lymph node positive	OS, DFS	10	Univariate	77.2727
9	Gamallo C[8]	2001	Spain	210	74 (35.2)	infiltrating ductal carcinomas	>5%	no	Histologic grade，Lymph node status, ER, PR, HER2	OS, DFS	10	Univariate	65.9091
10	Jacquemier J[42]	2005	France	236	75 (63.6)	Typical medullary breast carcinomas	unknown	unclear	Histological grade	-	-	Univariate	0.5682
11	Kobayashi T[4]	2013	Japan	142	52 (36.6)	luminal-type breast cancer	>50%	unclear	Ki67, P53	OS, DFS	10	Univariate	81.8182
12	Lakis S[44]	2016	Greece	309	257 (83.2)	Triple-negative breast cancers	>10%	yes	Histologic grade，Lymph node status, Tumorsize (2cm), CK5/6, EGFR	OS, DFS	10	Multivariate	70.4545
13	Li M[38]	2016	China	76	46 (60.53)	Triple-negative breast cancers	>10%	no	Tumor size, Histologic grade, Lymph node status, clinial stage, ER, PR, HER2, Ki-67%	-	-	-	65.9091
14	Li Y[45]	2013	China	106	45 (42.5)	invasive breast carcinoma	>10%	no	Histologic grade，Lymph node status, clinial stage, ER, PR, HER2	-	-	-	63.6364
15	Liu N[46]	2012	China	213	91 (42.7)	invasive breast cancer	>10%	unclear	Histologic grade, Lymph node status, clinial stage, ER, PR, HER2, ki-67, Molecular sub-type	OS, DFS	5	Multivariate	70.4545
16	Martins D[17]	2010	Brazil	189	37 (19.6)	breast cancer	>10%	unclear	Molecular sub-type	-	-	-	63.6364
17	Matos I[30]	2005	Brazil&Portugal	145	46 (41.7)	breast carcinoma	>10%	unclear	Molecular sub-type	-	-	-	61.3636
18	Nalwoga H[47]	2007	Uganda	65	15 (23.1)	basal-like phenotype breast cancer	>10%	unclear	Histologic grade, ER, PR, HER-2, CK5/6, Ki-67	-	-	-	68.1818
19	Paredes J[31]	2007	Portugal	76	19 (25.0)	Ductal Carcinoma In Situ	>10%	unclear	Molecular sub-type	-	-	-	72.7273
20	Paredes J[39]	2008	Portugal	131	43 (32.8)	breast carcinoma	unknown	unclear	-	OS	10	Univariate	75
21	Paredes J[10]	2005	Portugal	147	46 (31.3)	Invasive Breast Carcinoma	>10%	unclear	ER, HER-2	OS,DFS	10	Univariate	59.0909
22	Peralta SA[26]	1999	Pennsylvania	183	95 (51.9)	invasive breast carcinomas	>10%	unclear	Histologic grade, ER	OS	5	Multivariate	61.3636
23	Potemski P[6]	2007	Poland	194	112 (57.7)	BasalPhenotype of Breast Basal Phenotype of Breast Carcinoma	>10%	unclear	Histologic grade, Lymph node status, clinial stage, ER, PR, HER2, CK5/6	OS	5	Univariate	79.5455
24	Rakha[29]	2007	UK	1726	760 (52)	invasive breast carcinoma	>5%	unclear	Molecular sub-type	-	10	Univariate	79.5455
25	Ribeiro AS[48]	2013	Portugal	467	100 (21.4)	invasive breast carcinomas	>10%	unclear	Tumor size, Histologic grade, Lymph node status, ER, PR, HER2, CK5/6, EGFR	OS, DFS	10	Multivariate	72.7273
26	Shi Y[49]	2013	China	312	130 (41.7)	invasive breast carcinoma	>10%	no	Histologic grade，Lymph node status, clinial stage, ER, PR, HER2	-	-	-	61.3636
27	Sousa B[34]	2014	Portugal	473	145 (31%)	invasive breast carcinomas	>20%	unclear	Histologic grade, Lymph node status, ER, PR, HER2, KI67, luminal A, luminal B, Basal	-	-	Univariate	0.6818
28	Sullivan HC[40]	2014	USA	149	140 (94.0)	Triple-negative breast cancers	>10%	unclear	-	OS, DFS	10	Multivariate	75
29	Tsang JY[36]	2013	China	1121	257 (22.9)	Basal-like breast cancer	>10%	unclear	Histologic grade, ER, PR, HER2, KI67, luminal A, luminal B, Basal	OS, DFS	10	Univariate	77.2727
30	Turashvili G[33]	2011	USA	3710	1290 (34.8)	invasive breast carcinoma	>50%	unclear	invasive breast carcinoma, ER，PR, HER2, Molecular sub-type	OS	10	Multivariate	72.7273
31	Vieira AF[12]	2017	Portugal	135	34 (25.2)	invasive breast carcinoma with axillary lymph node metastases	>10%	no	Tumor size, Histologic grade, Molecular sub-type	OS, DFS	10	Univariate	68.1818
OS: Overall survival; DFS: Disease-free survival
